# Supplementary material for: Valence state control of Cr4+-activated Li2SrGeO4for NIR-II light source to distinguish deuterium and non-deuterium reagents
Source: Royal Society of Chemistry journal article supplement (doi:10.1039/d3tc00762f), 2023-01-01
Supplement: d3tc00762f1.pdf [file d3tc00762f1.pdf]

## Supplementary Information

### **Valence state control of Cr<sup>4+</sup>-activated Li<sub>2</sub>SrGeO<sub>4</sub> for NIR-II light source to distinguish deuterium and non-deuterium reagents**

Xiaoxuan Guo<sup>a</sup>, Bomei Liu<sup>\*a</sup>, Rongyi Kuang<sup>a</sup>, Weijiang Gan<sup>c</sup>, Lin Huang<sup>a</sup>, Jing Wang<sup>\*ab</sup>

<sup>a</sup>Ministry of Education Key Laboratory of Bioinorganic and Synthetic Chemistry, State Key Laboratory of Optoelectronic Materials and Technologies, School of Chemistry, Sun Yat-Sen University, Guangzhou 510006, China

<sup>b</sup>Nanchang Research Institute, Sun Yat-sen University, Nanchang, Jiangxi, 330099, China

<sup>c</sup>Guangxi Academy of Sciences, Nanning, Guangxi, 530007, China.

## Section 1: Figures and tables

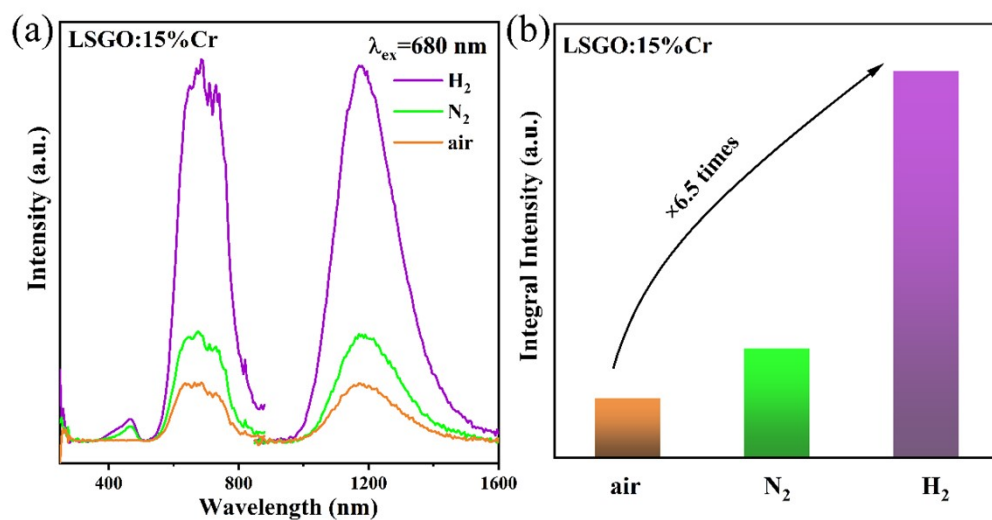

**Figure S1.** (a) PL/PLE spectra and (b) PL integral intensity of LSGO:15%Cr sintered in air/N<sub>2</sub>/H<sub>2</sub> atmosphere.

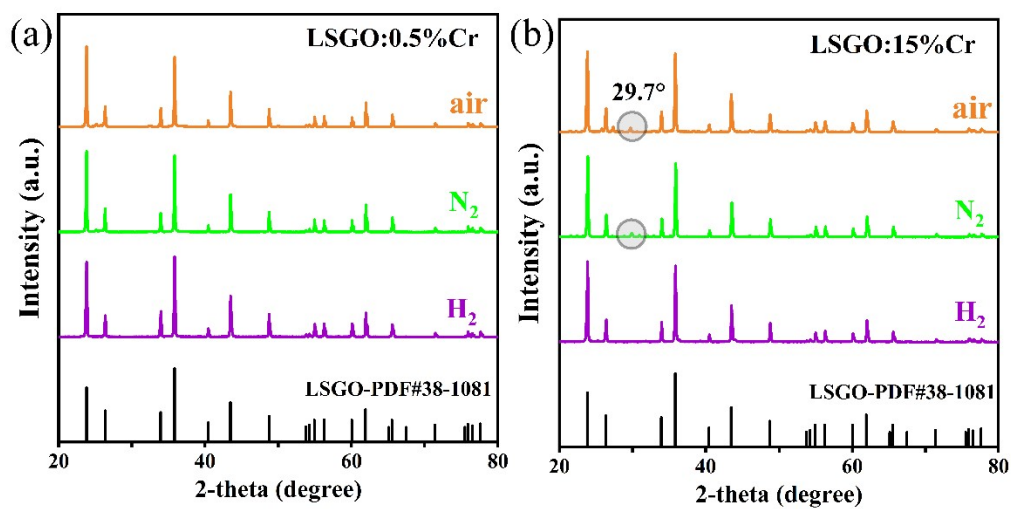

**Figure S2.** XRD patterns of (a) LSGO:0.5%Cr and (b) LSGO:15%Cr sintered in air/N<sub>2</sub>/H<sub>2</sub> atmosphere.

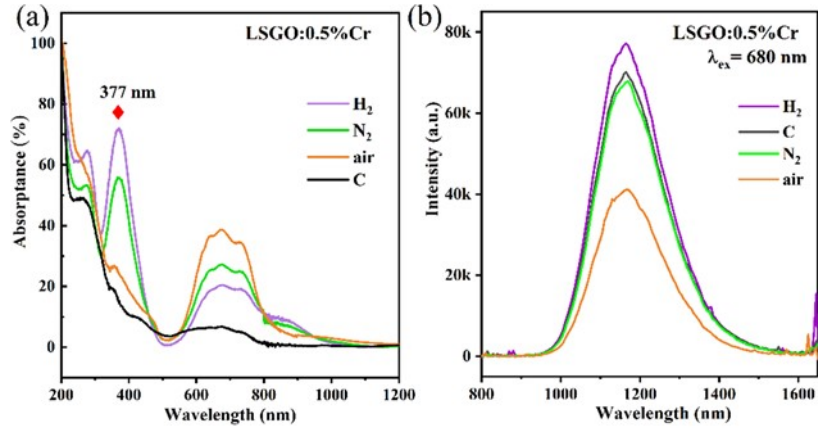

**Figure S3.** The (a) Abs and (b) PL of LSGO:0.5%Cr sintered in air/N<sub>2</sub>/H<sub>2</sub> atmosphere and active carbon.

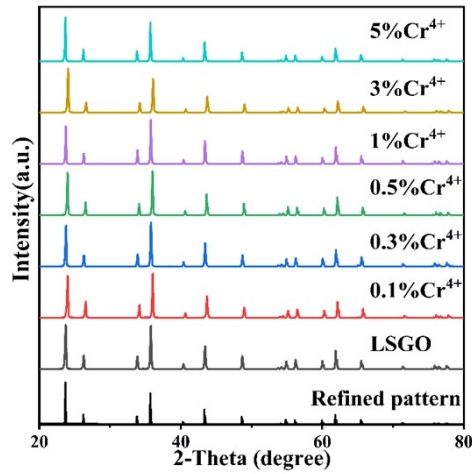

**Figure S4.** The XRD patterns of LSGO: $x\text{Cr}^{4+}$  ( $x = 0\text{-}5\%$ ) sintered in H<sub>2</sub>.

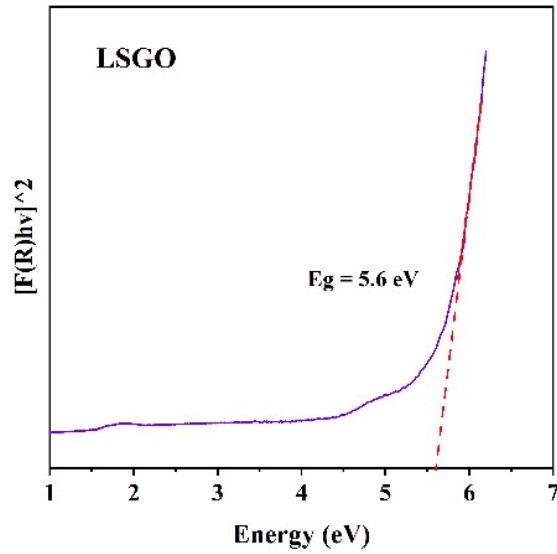

**Figure S5** The Abs spectra of LSGO with  $[F(R)\times hv]^2$  as a function of photon energy for determining the band energy.

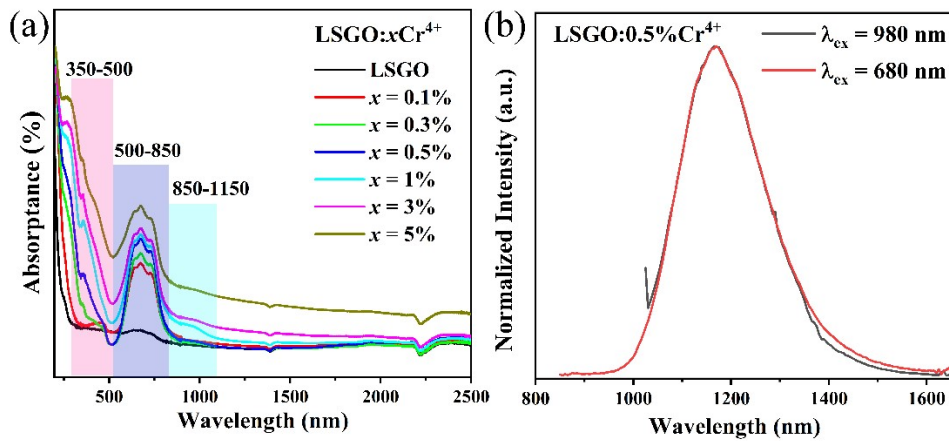

**Figure S6.** (a) The absorption spectra of LSGO: $x\text{Cr}^{4+}$  ( $x = 0\text{-}5\%$ ). (b) The normalized PL spectra of LSGO: $0.5\%\text{Cr}^{4+}$  excited at 680nm and 980 nm, respectively.

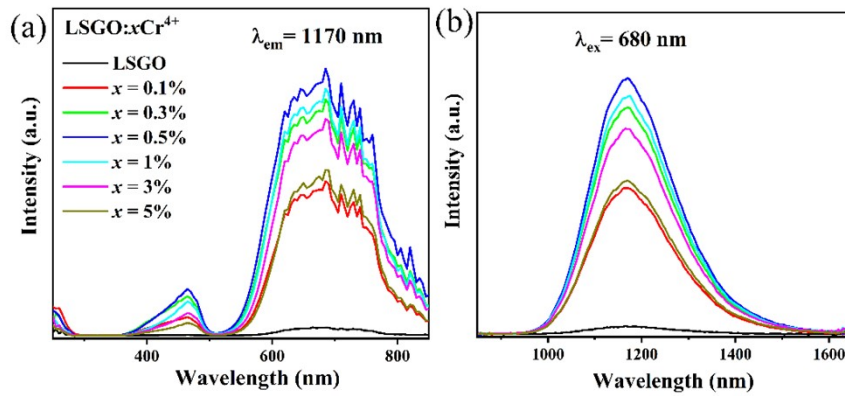

**Figure S7.** PLE/PL spectra of LSGO: $x\%Cr^{4+}$  ( $x = 0-5\%$ ).

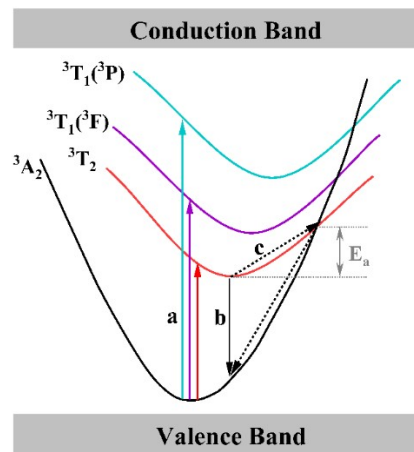

**Figure S8.** Configuration coordinate diagram of  $Cr^{4+}$  to explain the thermal quenching behavior.

**Discussion for Figure S8:** At low temperature, after excited, a majority of electrons will jump from ground state to excited states and relax to  ${}^3T_2$  level (process a). After that, high-energy electrons will return to the ground state via radiative transition, along with NIR-II emission (process b). However, in the case of higher temperature, electrons will easily gain more energy to reach the crossover point of  ${}^3T_2$  level and  ${}^3A_2$  level, resulting in the nonradiative transition known as thermal quenching (process c). The higher the crossover point, that is, the larger the value of  $E_a$ , the harder it is for electrons to carry out process c. Therefore, it

can be concluded that the larger activation energy is beneficial to the thermal stability of phosphors.

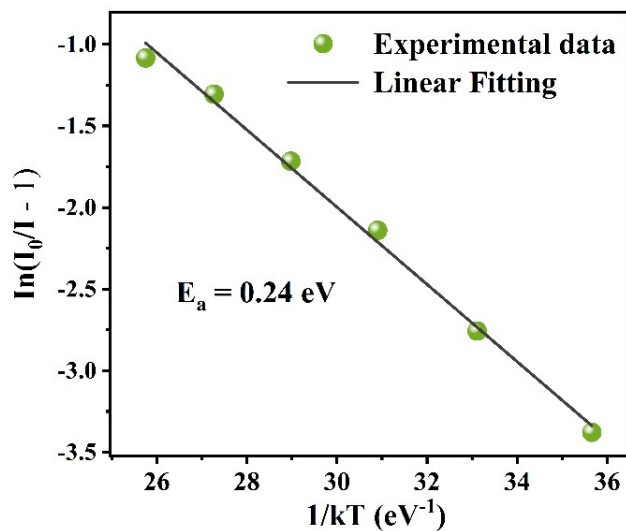

**Figure S9.** The plot of  $\ln(I_0/I - 1)$  versus  $1/kT$  of LSGO:0.5%  $\text{Cr}^{4+}$

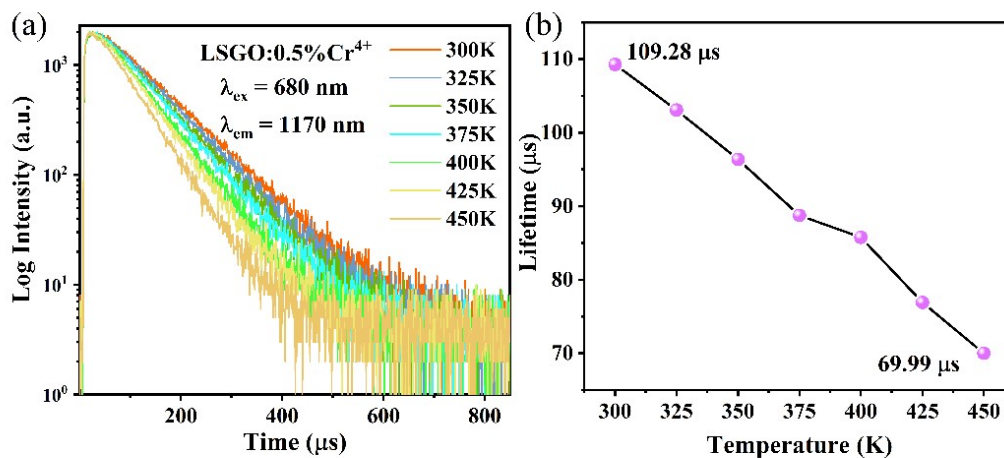

**Figure S10.** (a) The fluorescent decay curves and (b) the temperature dependent lifetime of LSGO:0.5%  $\text{Cr}^{4+}$  at difference temperatures.

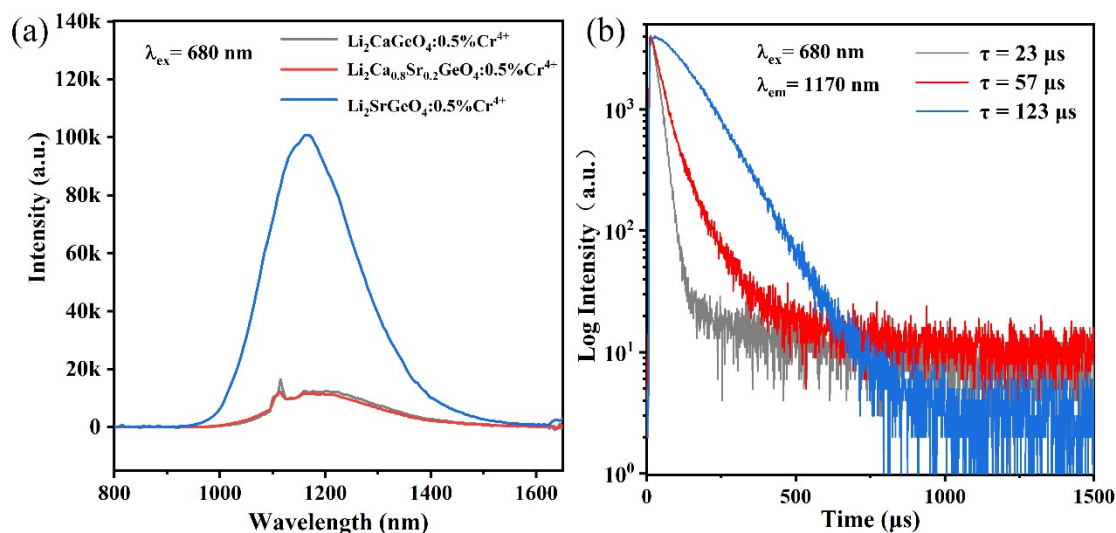

**Figure S11.** (a) The PL spectra and (b) the fluorescent decay curves of  $\text{Li}_2\text{CaGeO}_4:0.5\%\text{Cr}^{4+}$ ,  $\text{Li}_2\text{Ca}_{0.8}\text{Sr}_{0.2}\text{GeO}_4:0.5\%\text{Cr}^{4+}$  and  $\text{Li}_2\text{SrGeO}_4:0.5\%\text{Cr}^{4+}$ .

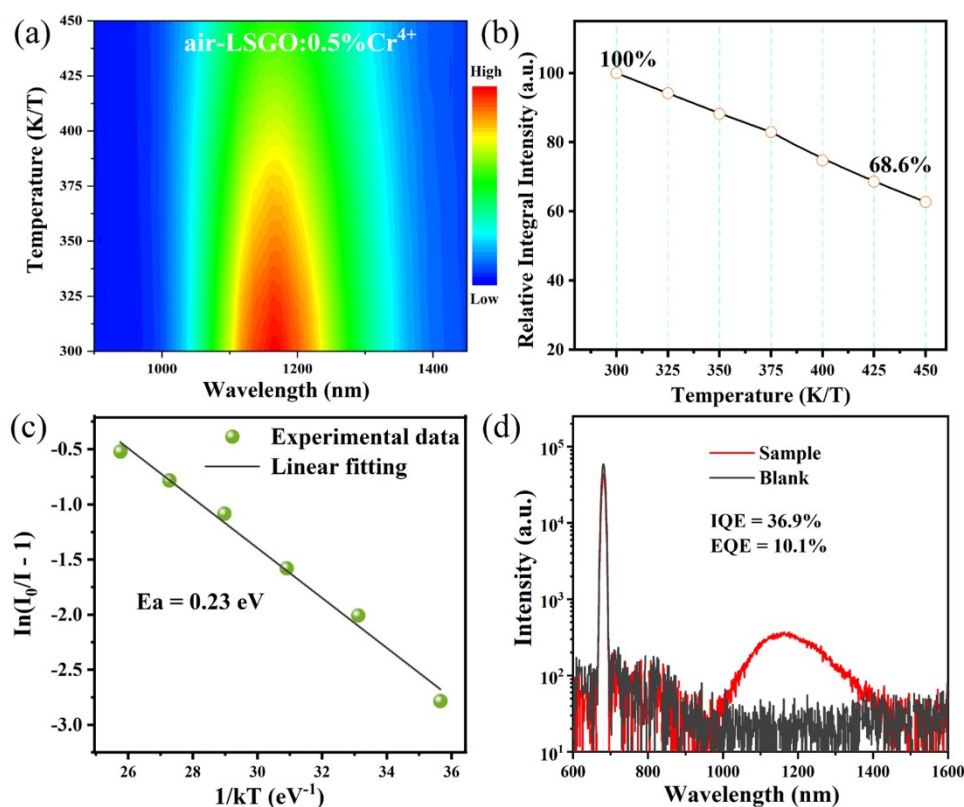

**Figure S12.** Related data and measurements of the LSGO:0.5%Cr<sup>4+</sup> phosphor calcined in air atmosphere, including (a) the two-dimensional color map of temperature-dependent emission spectra. (b) relative PL integral intensity at different temperatures. (c) the plot of  $\ln(I_0/I - 1)$  versus  $1/kT$ . (d) the measurement of QE excited at 680 nm.

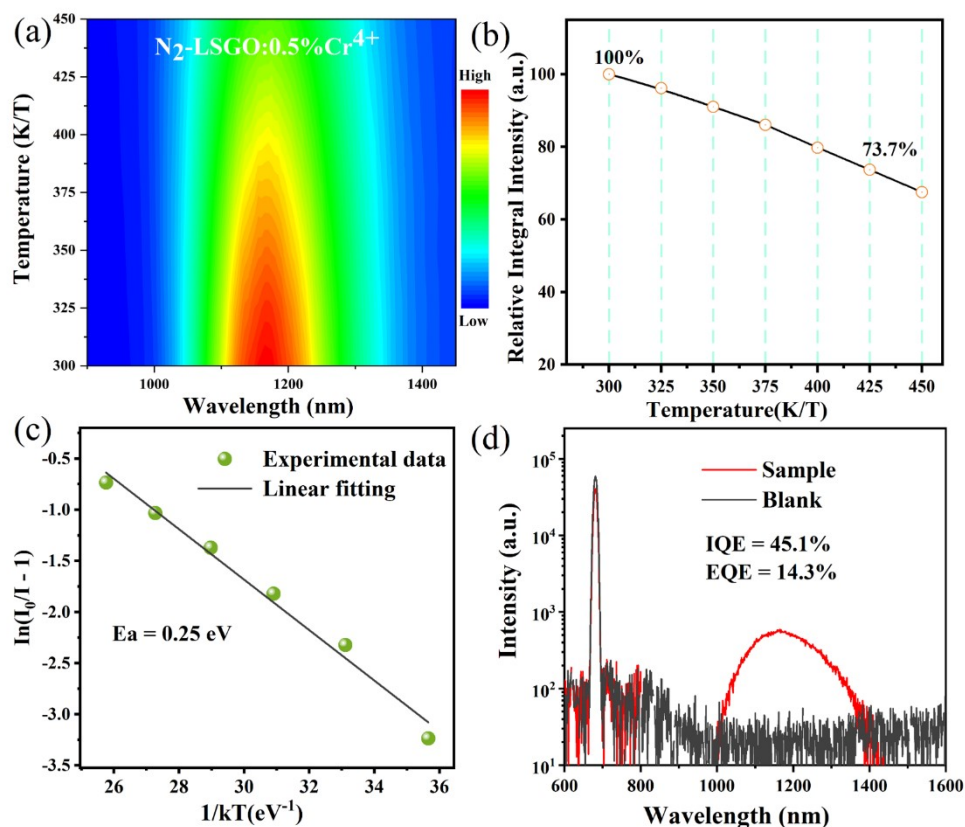

**Figure S13.** Related data and measurements of the LSGO:0.5%Cr<sup>4+</sup> phosphor calcined in N<sub>2</sub> atmosphere, including (a) the two-dimensional color map of temperature-dependent emission spectra. (b) relative PL integral intensity at different temperatures. (c) the plot of  $\ln(I_0/I - 1)$  versus  $1/kT$ . (d) the measurement of QE excited at 680 nm.

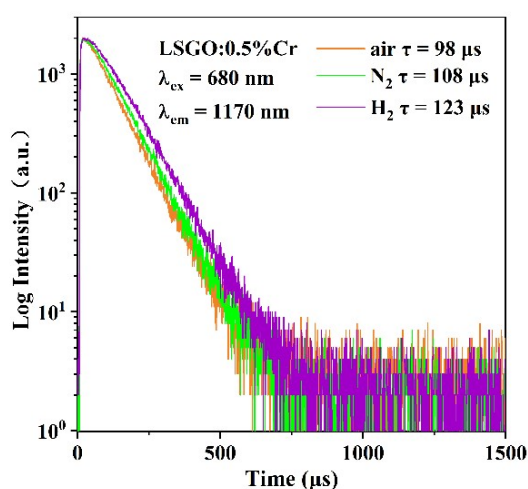

**Figure S14.** The fluorescent decay curves and lifetime of LSGO:0.5%Cr<sup>4+</sup> at difference atmospheres.



**Table S1.** EXAFS fitting parameters at the Cr K-edge for various samples.  $S_0^2=0.8$ 

| Sample                             | Path  | CN  | R( $\text{\AA}$ ) | $\sigma^2(\text{\AA}^2)$ | $\Delta E_0(\text{eV})$ | R factor |
|------------------------------------|-------|-----|-------------------|--------------------------|-------------------------|----------|
| <b>Cr<sub>2</sub>O<sub>3</sub></b> | Cr-O1 | 3.0 | 1.96              | 0.0088                   | -3.20                   | 0.0122   |
|                                    | Cr-O2 | 3.0 | 1.98              | 0.0022                   | -9.05                   |          |
| <b>CrO<sub>2</sub></b>             | Cr-O1 | 2.0 | 1.78              | 0.0124                   | -8.12                   | 0.0117   |
|                                    | Cr-O2 | 4.2 | 1.93              | 0.0087                   | -15.09                  |          |
| <b>Sample</b>                      | Cr-O  | 4.1 | 1.98              | 0.0024                   | 2.24                    | 0.0171   |

**Table S2.** Structural parameters for LSGO refined by Rietveld analysis of powder XRD at

| <b>Li<sub>2</sub>SrGeO<sub>4</sub></b> |          |          | <b>a=b=5.27680<math>\text{\AA}</math></b> | <b><math>\alpha=\beta=\gamma=90^\circ</math></b> |      |                 |
|----------------------------------------|----------|----------|-------------------------------------------|--------------------------------------------------|------|-----------------|
|                                        |          |          | <b>c=6.75400<math>\text{\AA}</math></b>   | <b>V=188.0626<math>\text{\AA}^3</math></b>       |      |                 |
| Atom                                   | <i>x</i> | <i>y</i> | <i>z</i>                                  | Occ.                                             | Wyck | Sym.            |
| Li                                     | 0.0000   | 0.50000  | 0.25000                                   | 1                                                | 4d   | -4 $\cdot\cdot$ |
| Sr                                     | 0.0000   | 0        | 0.50000                                   | 1                                                | 2b   | -42m            |
| Ge                                     | 0.0000   | 0        | 0.00000                                   | 1                                                | 2a   | -42m            |
| O                                      | 0.19900  | 0.199000 | 0.14900                                   | 1                                                | 8i   | $\cdot\cdot$ m  |

room temperature.

**Table S3.** Bond  
LSGOLength ( $\text{\AA}$ ) of

| Vector | Length( $\text{\AA}$ ) |
|--------|------------------------|
| Li-O   | 2.02256                |
| Ge-O   | 1.79390                |
| Sr-O1  | 2.79390                |
| Sr-O2  | 2.46135                |

| <b>Materials</b>                                               | <b>Activator</b>                  | $\lambda_{\text{ex}}$<br><b>(nm)</b> | $\lambda_{\text{em}}$<br><b>(nm)</b> | <b>FHWM</b><br><b>(nm)</b> | <b>IQE</b><br><b>%</b> | <b>EQE</b><br><b>%</b> | <b>Reference</b> |
|----------------------------------------------------------------|-----------------------------------|--------------------------------------|--------------------------------------|----------------------------|------------------------|------------------------|------------------|
| CsPbI <sub>3</sub>                                             | Bi <sup>3+</sup>                  | 450                                  | 1145                                 | 450                        | 7.17                   | —                      | 1                |
| Cs <sub>2</sub> AgInCl <sub>6</sub>                            | Cr <sup>3+</sup>                  | 760                                  | 1010                                 | 180                        | 22.03                  | —                      | 2                |
| Li <sub>2</sub> ZnGeO <sub>4</sub>                             | Cr <sup>4+</sup>                  | 675                                  | 1230                                 | 213                        | 8.86                   | —                      | 3                |
| CaTiO <sub>3</sub>                                             | Ni <sup>2+</sup>                  | 375                                  | 1377                                 | 212                        | 1.4                    | —                      | 4                |
| SrTiO <sub>3</sub>                                             | Ni <sup>2+</sup>                  | 375                                  | 1311                                 | 192                        | 6.5                    | —                      | 4                |
| Y <sub>3</sub> Al <sub>2</sub> Ga <sub>3</sub> O <sub>12</sub> | Ni <sup>2+</sup>                  | 400                                  | 1450                                 | 300                        | 54                     | 8.2                    | 5                |
| MgSn <sub>2</sub> O <sub>4</sub>                               | Ni <sup>2+</sup>                  | 680                                  | 1480                                 | 297                        | 21.6                   | 4.9                    | 6                |
| MgO                                                            | Ni <sup>2+</sup> Cr <sup>3+</sup> | 455                                  | 1335                                 | 235                        | 92.7                   | 25.9                   | 7                |
| Li <sub>(0.2)</sub> MgO                                        | Ni <sup>2+</sup>                  | 680                                  | 1420                                 | 350                        | 42.9                   | 9.6                    | 8                |
| Li <sub>(0.1)</sub> MgO                                        | Ni <sup>2+</sup>                  | 680                                  | 1340                                 | 240                        | 73.2                   | 11.6                   | 8                |
| Li <sub>2</sub> SrGeO <sub>4</sub>                             | Cr <sup>4+</sup>                  | 680                                  | 1170                                 | 208                        | 87.8                   | 30.0                   | this work        |

**Table S4.** Several phosphors reported for NIR-II emission (>1000 nm)

Note: — indicates no reference data. The standard deviation of the IQE is 3.8%

## Section 2: Equation

Equation S1: The energetic structure of the  $d^2$  system can be described quantitatively by  $Dq/B$ , which can be calculated as follow:

$$E[{}^3T_1({}^3F)] - E[{}^3A_2({}^3F)] = m$$

$$E[{}^3T_1({}^3P)] - E[{}^3T_1({}^3F)] = n$$

$$\frac{Dq}{B} = \frac{27(9m + 9n - \sqrt{-4m^2 - 8mn + 81n^2})}{8(7m + 7n + 3\sqrt{-4m^2 - 8mn + 81n^2})}$$

where  $Dq$  is the crystal field strength,  $B$  is the Racah parameter.  $m$  is the energy of  ${}^3A_2 \rightarrow {}^3T_1({}^3F)$ .  $n$  is the energy difference between  ${}^3T_1({}^3P)$  and  ${}^3T_1({}^3F)$ .

**Equation S2.** A modified Arrhenius equation

$$I = \frac{I_0}{1 + A \cdot \exp\left(-\frac{E_a}{k \cdot T}\right)}$$

Where  $I_0$  is the initial integrated intensity,  $I$  is the integrated intensity at a given testing temperature  $T$ ,  $A$  and  $k$  represent the Arrhenius constant and the Boltzmann constant, respectively.

**Equation S3.** Calculation equation for IQE and EQE.

$$\eta_{IQE} = \frac{\int L_S}{\int E_S - \int E_R}$$

$$\eta_{EQE} = \frac{\int L_S}{\int E_R}$$

Where,  $L_S$  is the emission spectrum of the sample;  $E_S$  and  $E_R$  represent the spectra of the given excitation with and without the sample, respectively.

## Reference

- 1 F.-P. Zhu, Z.-J. Yong, B.-M. Liu, Y.-M. Chen, Y. Zhou, J.-P. Ma, H.-T. Sun and Y.-Z. Fang, *Optics Express*, 2017, **25**, 33283-33289.
- 2 F. Zhao, Z. Song, J. Zhao and Q. Liu, *Inorganic Chemistry Frontiers*, 2019, **6**, 3621-3628.
- 3 S. Yuan, Z. Mu, L. Lou, S. Zhao, D. Zhu and F. Wu, *Ceramics International*, 2022, **48**, 26884-26893.
- 4 Y. Gao, B. Wang, L. Liu and K. Shinozaki, *Journal of Luminescence*, 2021, **238**.
- 5 L. Yuan, Y. Jin, H. Wu, K. Deng, B. Qu, L. Chen, Y. Hu and R.-S. Liu, *Acs Applied Materials & Interfaces*, 2022, **14**, 4265-4275.
- 6 B.-M. Liu, X.-X. Guo, L. Huang, R.-F. Zhou, R. Zou, C.-G. Ma and J. Wang, *Advanced Materials Technologies*, 2022, 2201181.
- 7 B.-M. Liu, X.-X. Guo, L.-Y. Cao, L. Huang, R. Zou, Z. Zhou, J. Wang, *Chemical Engineering Journal*, 2023, **452**, 139313.
- 8 B.-M. Liu, S.-M. Gu, L. Huang, R.-F. Zhou, Z. Zhou, C.-G. Ma, R. Zou and J. Wang, *Cell Reports Physical Science*, 2022, **3**, 101078
